# Supplementary material for: Signal Transduction by VIP and PACAP Receptors
Source: MDPI journal article supplement (doi:10.3390/biomedicines10020406), 2022-02-09
Supplement: s1 [file s1]

# Supplementary

## Signal transduction by VIP and PACAP receptors

Ingrid Langer<sup>1</sup>, Jérôme Jeandriens<sup>1</sup>, Alain Couvineau<sup>2</sup>, Swapnil Sanmukh<sup>3</sup>, Dorota Latek<sup>3,\*</sup>

<sup>1</sup>Institut de Recherche Interdisciplinaire en Biologie Humaine et Moléculaire (IRIBHM),  
Université libre de Bruxelles, B-1070 Brussels, Belgium

<sup>2</sup> Université de Paris, UMR 1149 Inserm - Centre de Recherche sur l'Inflammation (CRI),  
75018 Paris, France

<sup>3</sup>Faculty of Chemistry, University of Warsaw, 02-093 Warsaw, Poland

**Figure S1.** Network of all class B receptors and their peptide endogenous agonists. This network of associations in Homo Sapiens was obtained from Szklarczyk et al. (the highest confidence level setting). Close associations between: VIP and GHRH; SCT and PACAP (ADCYAP1) and VIPR1; VIP and CALCA were detected.

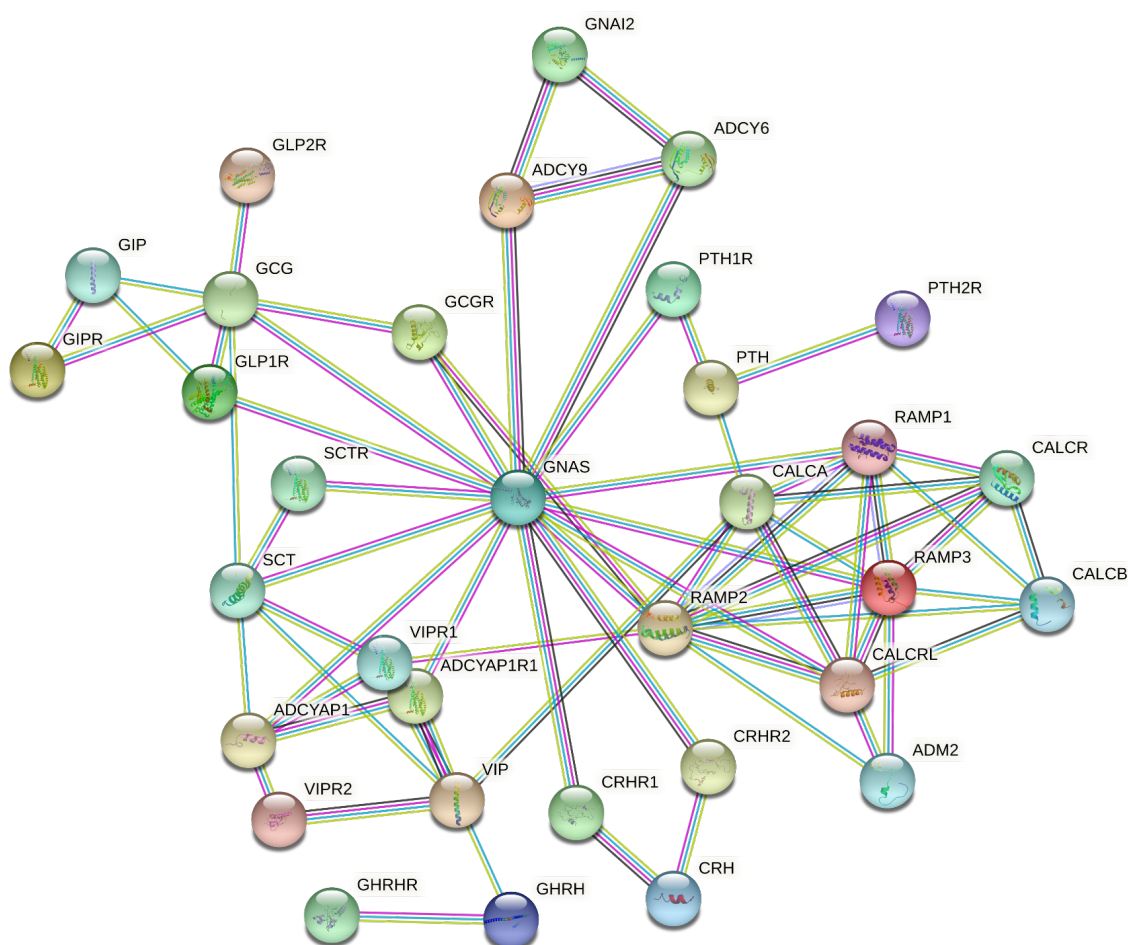

## Nodes:

Network nodes represent proteins  
splice isoforms or post-translational modifications are collapsed, i.e. each node represents all the proteins produced by a single, protein-coding gene locus.

## Node Color

colored nodes:  
query proteins and first shell of interactors  
white nodes:  
second shell of interactors

## Node Content

empty nodes:  
proteins of unknown 3D structure  
filled nodes:  
some 3D structure is known or predicted

## Edges:

Edges represent protein-protein associations  
associations are meant to be specific and meaningful, i.e. proteins jointly contribute to a shared function; this does not necessarily mean they are physically binding to each other.

## Known Interactions

from curated databases  
experimentally determined

## Predicted Interactions

gene neighborhood  
gene fusions  
gene co-occurrence

## Others

textmining  
co-expression  
protein homology

**Figure S2.** Sequence variation in TM helices of class B GPCRs. Amino acids were marked from the least conserved among class B GPCR sequences (blue) to the most conserved (red). The most conserved amino acids were marked in the right panel representing an inactive conformation of VPAC1 based on 5VEW.

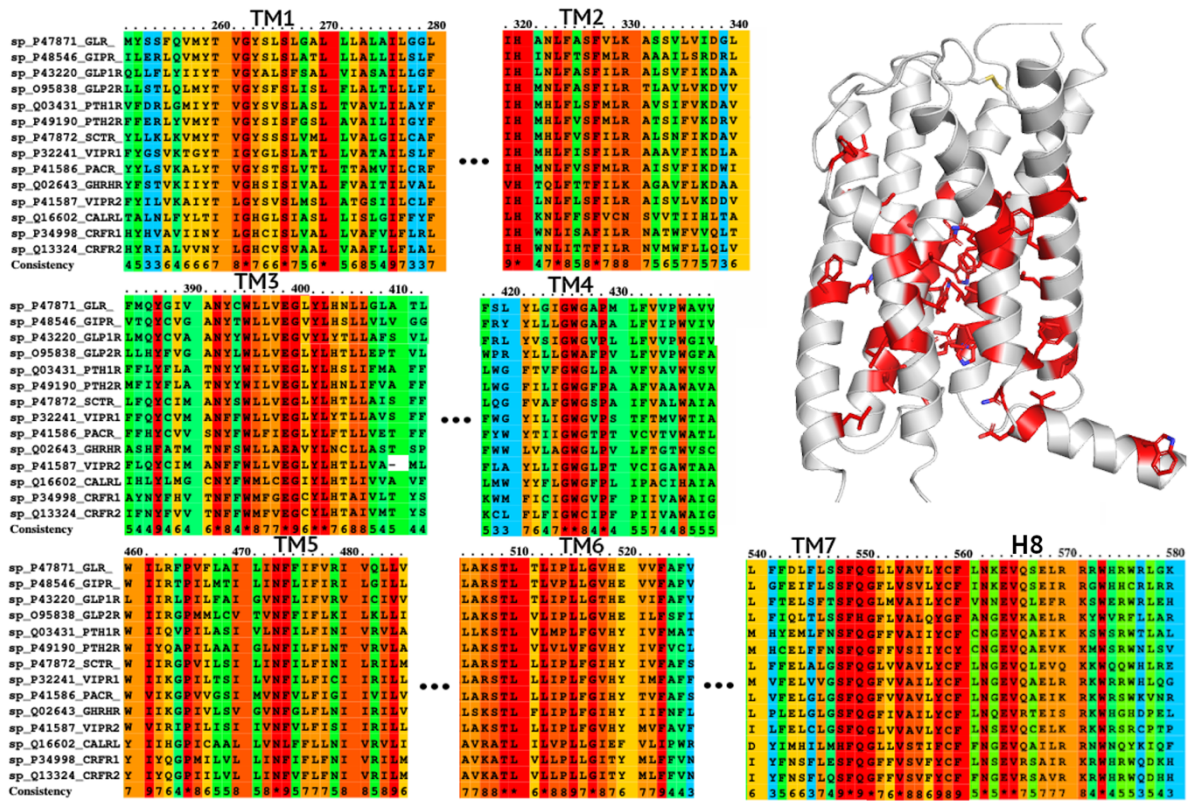

**Figure S3.** Co-occurrence of class B GPCRs and their peptide agonists in various species obtained from Szklarczyk et al. 2021.

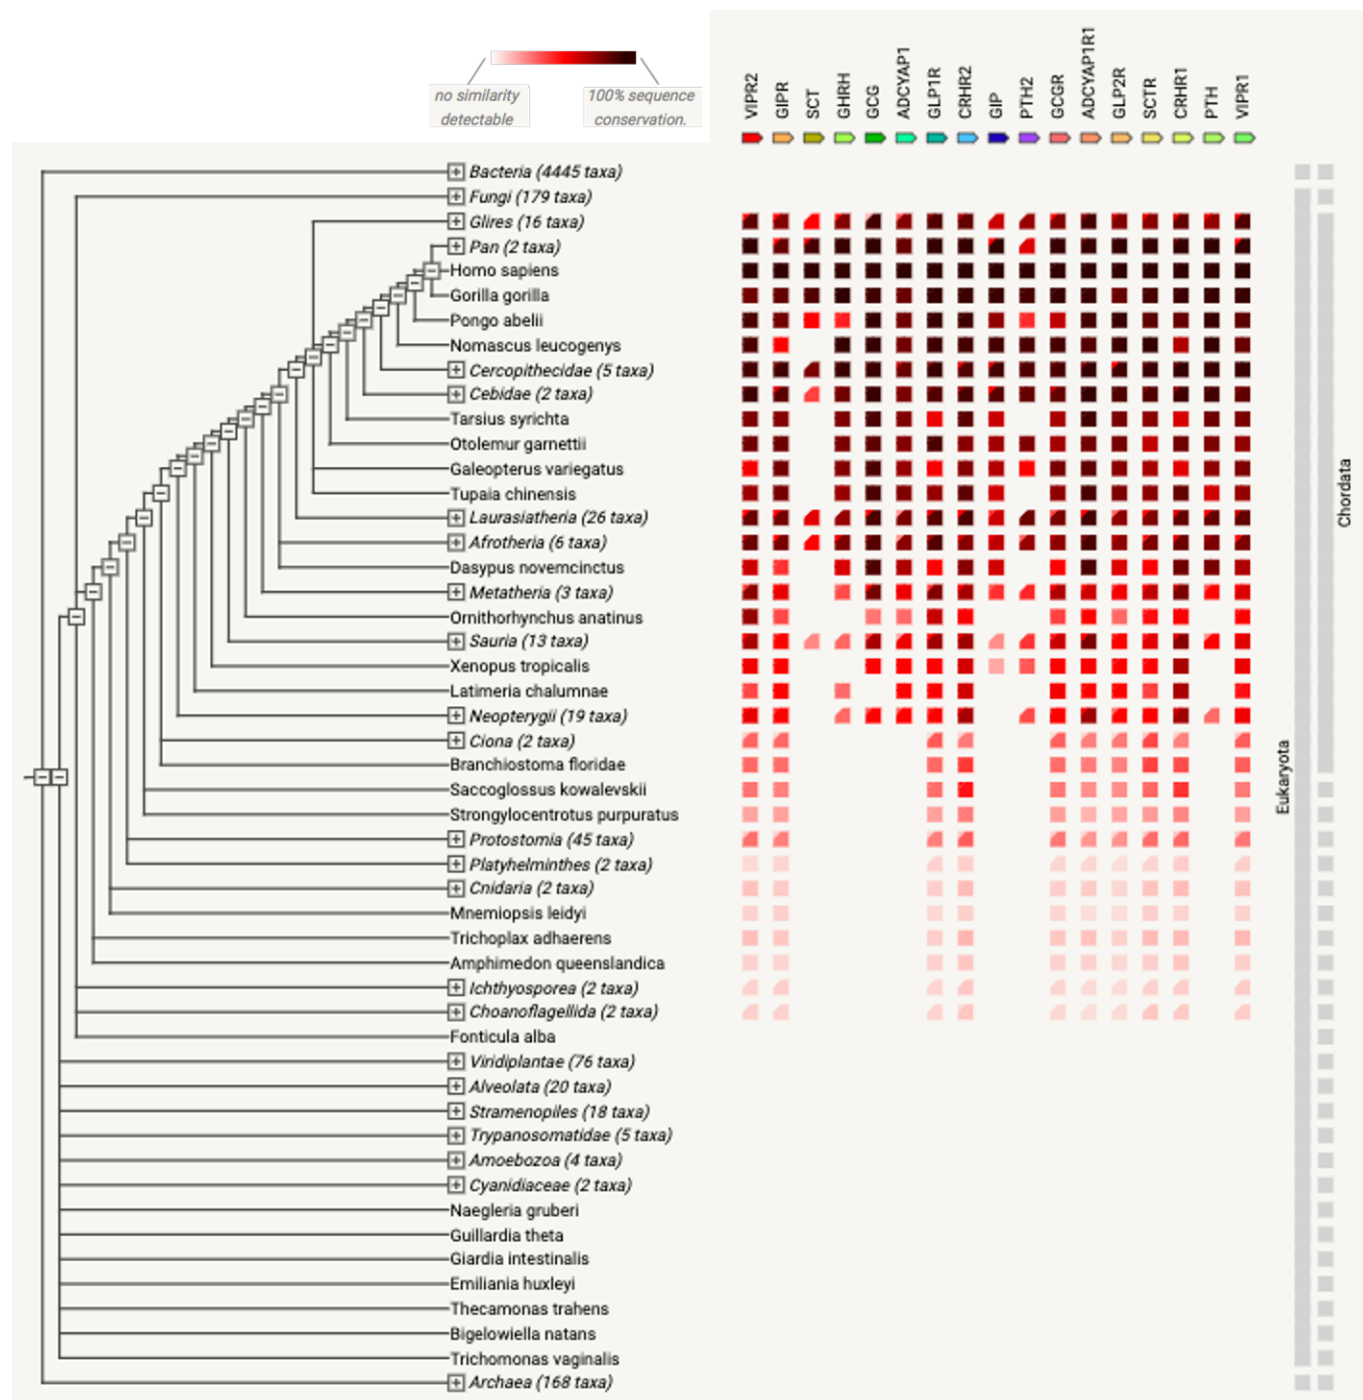

**Figure S4.** Isoforms of *VPAC1* deposited in NCBI.

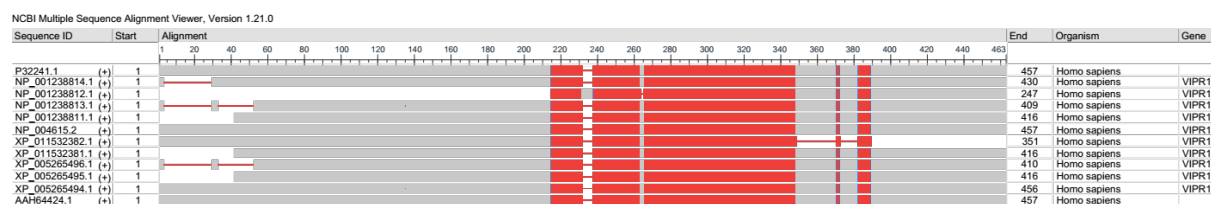

**Figure S5.** Isoforms of *VPAC2* deposited in NCBI.

NCBI Multiple Sequence Alignment Viewer, Version 1.21.0

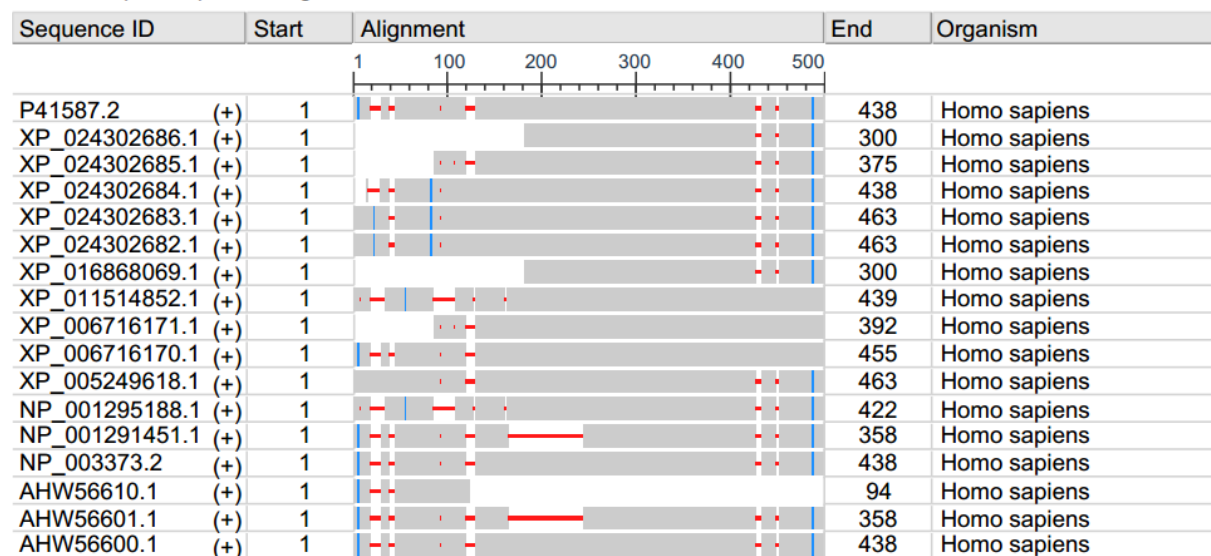

**Figure S6. Multiple sequence alignment (MSA) of five VPAC1 sequences deposited in Uniprot.**

|                 |             |     |                                                                 |     |
|-----------------|-------------|-----|-----------------------------------------------------------------|-----|
| <u>P32241</u>   | VIPR1_HUMAN | 1   | MRPPSPLP-----ARWLCLVLAG---ALAWAL-----GPA---G-----               | 27  |
| <u>P32241-2</u> | VIPR1_HUMAN | 1   | MPPPLLSLRRLGGGSVAVTRLVVAAAGARSRGGRGSGRAGGGGRRGVARRRRLLELRAA     | 60  |
| <u>P32241-3</u> | VIPR1_HUMAN | 1   | -----                                                           | 0   |
| <u>P32241-4</u> | VIPR1_HUMAN | 1   | -----                                                           | 0   |
| <u>P32241-5</u> | VIPR1_HUMAN | 1   | -----                                                           | 0   |
| <u>P32241</u>   | VIPR1_HUMAN | 28  | --GQAARLQEECDYVQMIIEVQHKQCLEEAQLENETIGCSKMWDNLTCPATPRGQVVVLA    | 85  |
| <u>P32241-2</u> | VIPR1_HUMAN | 61  | RSLGSSSLQEECDYVQMIIEVQHKQCLEEAQLENETIGCSKMWDNLTCPATPRGQVVVLA    | 120 |
| <u>P32241-3</u> | VIPR1_HUMAN | 1   | -----                                                           | 0   |
| <u>P32241-4</u> | VIPR1_HUMAN | 1   | -----MRAGRRPRLGFWAGGCSKMWDNLTCPATPRGQVVVLA                      | 38  |
| <u>P32241-5</u> | VIPR1_HUMAN | 1   | -----MIEVQHKQCLEEAQLENETIGCSKMWDNLTCPATPRGQVVVLA                | 44  |
| <u>P32241</u>   | VIPR1_HUMAN | 86  | CPLIFKLFSSIQGRNVSRSCDTDEGWTHTLEPGPYPIACGLDDKAASLDEQQTMYFGSVKGTG | 145 |
| <u>P32241-2</u> | VIPR1_HUMAN | 121 | CPLIFKLFSSIQGRNVSRSCDTDEGWTHTLEPGPYPIACGLDDKAASLDEQQTMYFGSVKGTG | 180 |
| <u>P32241-3</u> | VIPR1_HUMAN | 1   | -----                                                           | 0   |
| <u>P32241-4</u> | VIPR1_HUMAN | 39  | CPLIFKLFSSIQGRNVSRSCDTDEGWTHTLEPGPYPIACGLDDKAASLDE-QTMYFGSVKGTG | 97  |
| <u>P32241-5</u> | VIPR1_HUMAN | 45  | CPLIFKLFSSIQGRNVSRSCDTDEGWTHTLEPGPYPIACGLDDKAASLDEQQTMYFGSVKGTG | 104 |
| <u>P32241</u>   | VIPR1_HUMAN | 146 | YTIGYGLSLATLLVATAILSLFRKLHCTRNYIHMHLFISFILRAAAVFIKDLALFDSGES    | 205 |
| <u>P32241-2</u> | VIPR1_HUMAN | 181 | YTIGYGLSLATLLVATAILSLFRKLHCTRNYIHMHLFISFILRAAAVFIKDLALFDSGES    | 240 |
| <u>P32241-3</u> | VIPR1_HUMAN | 1   | -----                                                           | 0   |
| <u>P32241-4</u> | VIPR1_HUMAN | 98  | YTIGYGLSLATLLVATAILSLFRKLHCTRNYIHMHLFISFILRAAAVFIKDLALFDSGES    | 157 |
| <u>P32241-5</u> | VIPR1_HUMAN | 105 | YTIGYGLSLATLLVATAILSLFRKLHCTRNYIHMHLFISFILRAAAVFIKDLALFDSGES    | 164 |
| <u>P32241</u>   | VIPR1_HUMAN | 206 | DQCSEGSVGCKAAMVFFQYCVCM-----ANFFWLLVEGLYLYTLLAVSFFSERKYFWGYI    | 259 |
| <u>P32241-2</u> | VIPR1_HUMAN | 241 | DQCSEGSVGCKAAMVFFQYCVCM-----ANFFWLLVEGLYLYTLLAVSFFSERKYFWGYI    | 294 |
| <u>P32241-3</u> | VIPR1_HUMAN | 1   | -----MTRQRVWMRWAVRQPWSFSNIVSWLTSSGCWWRASCTCPCLPSPSSLS--G        | 49  |
| <u>P32241-4</u> | VIPR1_HUMAN | 158 | DQCSEGSVGCKAAMVFFQYCVCM-----ANFFWLLVEGLYLYTLLAVSFFSERKYFWGYI    | 211 |
| <u>P32241-5</u> | VIPR1_HUMAN | 165 | DQCSEGSVGCKAAMVFFQYCVCM-----ANFFWLLVEGLYLYTLLAVSFFSERKYFWGYI    | 218 |
|                 |             |     | . *:::.* . ** .* : : . . : . . :                                |     |
| <u>P32241</u>   | VIPR1_HUMAN | 260 | LIGWGPSTFTMVWTIARIHFEDYGCWDTINSSLWMIKGPILTSILNVFILFICIRIL       | 319 |
| <u>P32241-2</u> | VIPR1_HUMAN | 295 | LIGWGPSTFTMVWTIARIHFEDYGCWDTINSSLWMIKGPILTSILNVFILFICIRIL       | 354 |
| <u>P32241-3</u> | VIPR1_HUMAN | 50  | STSGGVPSTFTMVWTIARIHFEDYGCWDTINSSLWMIKGPILTSILNVFILFICIRIL      | 109 |
| <u>P32241-4</u> | VIPR1_HUMAN | 212 | LIGWGPSTFTMVWTIARIHFEDYGCWDTINSSLWMIKGPILTSILNVFILFICIRIL       | 271 |
| <u>P32241-5</u> | VIPR1_HUMAN | 219 | LIGWGPSTFTMVWTIARIHFEDYGCWDTINSSLWMIKGPILTSILNVFILFICIRIL       | 278 |
|                 |             |     | *****                                                           |     |
| <u>P32241</u>   | VIPR1_HUMAN | 320 | LQKLRPPDIRKSDSSPYSLARSTLLIPLFGVHYIMFAFFPDNFKPEVKMVFELVVGSGF     | 379 |
| <u>P32241-2</u> | VIPR1_HUMAN | 355 | LQKLRPPDIRKSDSSPYSLARSTLLIPLFGVHYIMFAFFPDNFKPEVKMVFELVVGSGF     | 414 |
| <u>P32241-3</u> | VIPR1_HUMAN | 110 | LQKLRPPDIRKSDSSPYSLARSTLLIPLFGVHYIMFAFFPDNFKPEVKMVFELVVGSGF     | 169 |
| <u>P32241-4</u> | VIPR1_HUMAN | 272 | LQKLRPPDIRKSDSSPYSLARSTLLIPLFGVHYIMFAFFPDNFKPEVKMVFELVVGSGF     | 331 |
| <u>P32241-5</u> | VIPR1_HUMAN | 279 | LQKLRPPDIRKSDSSPYSLARSTLLIPLFGVHYIMFAFFPDNFKPEVKMVFELVVGSGF     | 338 |
|                 |             |     | *****                                                           |     |
| <u>P32241</u>   | VIPR1_HUMAN | 380 | QGFWVAILYCFNLGEVQAEELRRKWRWHLQGVLGWNPKYRHPSGGSNGATCSTQVSMLTR    | 439 |
| <u>P32241-2</u> | VIPR1_HUMAN | 415 | QGFWVAILYCFNLGEVQAEELRRKWRWHLQGVLGWNPKYRHPSGGSNGATCSTQVSMLTR    | 474 |
| <u>P32241-3</u> | VIPR1_HUMAN | 170 | QGFWVAILYCFNLGEVQAEELRRKWRWHLQGVLGWNPKYRHPSGGSNGATCSTQVSMLTR    | 229 |
| <u>P32241-4</u> | VIPR1_HUMAN | 332 | QGFWVAILYCFNLGEVQAEELRRKWRWHLQGVLGWNPKYRHPSGGSNGATCSTQVSMLTR    | 391 |
| <u>P32241-5</u> | VIPR1_HUMAN | 339 | QGFWVAILYCFNLGEVQAEELRRKWRWHLQGVLGWNPKYRHPSGGSNGATCSTQVSMLTR    | 398 |
|                 |             |     | *****                                                           |     |
| <u>P32241</u>   | VIPR1_HUMAN | 440 | VSPGARRSSSFQAEVSLV                                              | 457 |
| <u>P32241-2</u> | VIPR1_HUMAN | 475 | VSPGARRSSSFQAEVSLV                                              | 492 |
| <u>P32241-3</u> | VIPR1_HUMAN | 230 | VSPGARRSSSFQAEVSLV                                              | 247 |
| <u>P32241-4</u> | VIPR1_HUMAN | 392 | VSPGARRSSSFQAEVSLV                                              | 409 |
| <u>P32241-5</u> | VIPR1_HUMAN | 399 | VSPGARRSSSFQAEVSLV                                              | 416 |
|                 |             |     | *****                                                           |     |

**Figure S7. MSA of two VPAC2 sequences deposited in Uniprot.**

|                 |             |     |                                                               |  |
|-----------------|-------------|-----|---------------------------------------------------------------|--|
| <u>P41587</u>   | VIPR2_HUMAN | 1   | MRTLLPALLTCWLLAPVNSIHPECRFHLEIQEEETKCAELLRSQTE-----KHKACSG    |  |
| <u>P41587-2</u> | VIPR2_HUMAN | 1   | -----MPLWEAPSDHPANPPATLQG--HTSLPGQEEFARDPQSGLPQITSESSSF       |  |
|                 |             |     | : * : : * . : : : . * * : : : . : . *                         |  |
| <u>P41587</u>   | VIPR2_HUMAN | 55  | VWDNITCWRPANVGETVTVPCKVFSNFYISKAGNISKNCTSDGWSETFPDFVDACGYSDP  |  |
| <u>P41587-2</u> | VIPR2_HUMAN | 50  | SEGSLPSWSSGPAAGLNASHE-----GIGSSSDGNGDSKAATERVVSAMDTVR         |  |
|                 |             |     | ..: .* . .* :.. . *... :.*::: : * :. :                        |  |
| <u>P41587</u>   | VIPR2_HUMAN | 115 | EDESKITFYILVKAIYTLGYSVSLMSLATGSIILCLFRKLHCTRNYIHLNLFSLFILRAI  |  |
| <u>P41587-2</u> | VIPR2_HUMAN | 99  | RKHPEITFYILVKAIYTLGYSVSLMSLATGSIILCLFRKLHCTRNYIHLNLFSLFILRAI  |  |
|                 |             |     | ... :*****                                                    |  |
| <u>P41587</u>   | VIPR2_HUMAN | 175 | SVLVKDDVLYSSSGTLHCPDQPSWVGCKLSLVFLQYCIANFFWLLVEGLYLHTLLVAM    |  |
| <u>P41587-2</u> | VIPR2_HUMAN | 159 | SVLVKDDVLYSSSGTLHCPDQPSWVGCKLSLVFLQYCIANFFWLLVEGLYLHTLLVAM    |  |
|                 |             |     | *****                                                         |  |
| <u>P41587</u>   | VIPR2_HUMAN | 235 | LPPRRCFLAYLLIGWGLPTVCIGAWTAARLYLEDTCGWDNDHSPVWVIRIPILISIIIV   |  |
| <u>P41587-2</u> | VIPR2_HUMAN | 219 | LPPRRCFLAYLLIGWGLPTVCIGAWTAARLYLEDTCGWDNDHSPVWVIRIPILISIIIV   |  |
|                 |             |     | *****                                                         |  |
| <u>P41587</u>   | VIPR2_HUMAN | 295 | NFVLFISIIIRILLQKLTS PDVGGNDQSQYKRLAKSTLLIPLFGVHYMVFAVFPISISSK |  |
| <u>P41587-2</u> | VIPR2_HUMAN | 279 | NFVLFISIIIRILLQKLTS PDVGGNDQSQYKRLAKSTLLIPLFGVHYMVFAVFPISISSK |  |
|                 |             |     | *****                                                         |  |
| <u>P41587</u>   | VIPR2_HUMAN | 355 | YQILFELCLGSGFQGLVAVLYCFLNSEQCELKRKWRSRCPTPSASRDYRVCGSSFSRNG   |  |
| <u>P41587-2</u> | VIPR2_HUMAN | 339 | YQILFELCLGSGFQGLVAVLYCFLNSEQCELKRKWRSRCPTPSASRDYRVCGSSFSRNG   |  |
|                 |             |     | *****                                                         |  |
| <u>P41587</u>   | VIPR2_HUMAN | 415 | SEGALQFHRGSRASQFLQTETSVI                                      |  |
| <u>P41587-2</u> | VIPR2_HUMAN | 399 | SEGALQFHRGSRASQFLQTETSVI                                      |  |
|                 |             |     | *****                                                         |  |

**Figure S8. MSA of five PAC1 sequences deposited in Uniprot.**

|                 |            |     |                                                                 |     |
|-----------------|------------|-----|-----------------------------------------------------------------|-----|
| <u>P41586</u>   | PACR_HUMAN | 1   | MAGVVHVS LAALLLLP MAPAMHSDC I FKKEQAMCLEKIQRANELMGFNDSSPGCGMWDN | 60  |
| <u>P41586-2</u> | PACR_HUMAN | 1   | MAGVVHVS LAALLLLP MAPAMHSDC I FKKEQAMCLEKIQRANELMGFNDSSPGCGMWDN | 60  |
| <u>P41586-3</u> | PACR_HUMAN | 1   | MAGVVHVS LAALLLLP MAPAMHSDC I FKKEQAMCLEKIQRANELMGFNDSSPGCGMWDN | 60  |
| <u>P41586-4</u> | PACR_HUMAN | 1   | MAGVVHVS LAALLLLP MAPAMHSDC I FKKEQAMCLEKIQRANELMGFNDSSPGCGMWDN | 60  |
| <u>P41586-5</u> | PACR_HUMAN | 1   | MAGVVHVS LAALLLLP MAPAMHSDC I FKKEQAMCLEKIQRANELMGFNDSSP-----   | 52  |
| *****           |            |     |                                                                 |     |
| <u>P41586</u>   | PACR_HUMAN | 61  | ITCWKPAHV GEMVLVSCPELFRIFNP DQVWETETIGESDFGDSNSLDLSDMGVVS RNCTE | 120 |
| <u>P41586-2</u> | PACR_HUMAN | 61  | ITCWKPAHV GEMVLVSCPELFRIFNP DQVWETETIGESDFGDSNSLDLSDMGVVS RNCTE | 120 |
| <u>P41586-3</u> | PACR_HUMAN | 61  | ITCWKPAHV GEMVLVSCPELFRIFNP DQ-----DMGVVS RNCTE                 | 99  |
| <u>P41586-4</u> | PACR_HUMAN | 61  | ITCWKPAHV GEMVLVSCPELFRIFNP DQ-----DMGVVS RNCTE                 | 99  |
| <u>P41586-5</u> | PACR_HUMAN | 53  | ITCWKPAHV GEMVLVSCPELFRIFNP DQ-----DMGVVS RNCTE                 | 63  |
| *****           |            |     |                                                                 |     |
| <u>P41586</u>   | PACR_HUMAN | 121 | DGWSEPFPHYFDACGFDEYESE TGDQDYY YLSVKALYTVGYSTSLVTLTTAMVILCRFRK  | 180 |
| <u>P41586-2</u> | PACR_HUMAN | 121 | DGWSEPFPHYFDACGFDEYESE TGDQDYY YLSVKALYTVGYSTSLVTLTTAMVILCRFRK  | 180 |
| <u>P41586-3</u> | PACR_HUMAN | 100 | DGWSEPFPHYFDACGFDEYESE TGDQDYY YLSVKALYTVGYSTSLVTLTTAMVILCRFRK  | 159 |
| <u>P41586-4</u> | PACR_HUMAN | 100 | DGWSEPFPHYFDACGFDEYESE TGDQDYY YLSVKALYTVGYSTSLVTLTTAMVILCRFRK  | 159 |
| <u>P41586-5</u> | PACR_HUMAN | 64  | DGWSEPFPHYFDACGFDEYESE TGDQDYY YLSVKALYTVGYSTSLVTLTTAMVILCRFRK  | 123 |
| *****           |            |     |                                                                 |     |
| <u>P41586</u>   | PACR_HUMAN | 181 | LHCTRNFIH MNLFVSFMLRAISVFIKDWILYAEQDSNHCFISTVECKAVMVFFHYCVVSN   | 240 |
| <u>P41586-2</u> | PACR_HUMAN | 181 | LHCTRNFIH MNLFVSFMLRAISVFIKDWILYAEQDSNHCFISTVECKAVMVFFHYCVVSN   | 240 |
| <u>P41586-3</u> | PACR_HUMAN | 160 | LHCTRNFIH MNLFVSFMLRAISVFIKDWILYAEQDSNHCFISTVECKAVMVFFHYCVVSN   | 219 |
| <u>P41586-4</u> | PACR_HUMAN | 160 | LHCTRNFIH MNLFVSFMLRAISVFIKDWILYAEQDSNHCFISTVECKAVMVFFHYCVVSN   | 219 |
| <u>P41586-5</u> | PACR_HUMAN | 124 | LHCTRNFIH MNLFVSFMLRAISVFIKDWILYAEQDSNHCFISTVECKAVMVFFHYCVVSN   | 183 |
| *****           |            |     |                                                                 |     |
| <u>P41586</u>   | PACR_HUMAN | 241 | YFWLFIEGLYLFTLLVETFFPERRYFYWYTIIGWGTPTVCVTVWATLRLYFDDTGCWDMN    | 300 |
| <u>P41586-2</u> | PACR_HUMAN | 241 | YFWLFIEGLYLFTLLVETFFPERRYFYWYTIIGWGTPTVCVTVWATLRLYFDDTGCWDMN    | 300 |
| <u>P41586-3</u> | PACR_HUMAN | 220 | YFWLFIEGLYLFTLLVETFFPERRYFYWYTIIGWGTPTVCVTVWATLRLYFDDTGCWDMN    | 279 |
| <u>P41586-4</u> | PACR_HUMAN | 220 | YFWLFIEGLYLFTLLVETFFPERRYFYWYTIIGWGTPTVCVTVWATLRLYFDDTGCWDMN    | 279 |
| <u>P41586-5</u> | PACR_HUMAN | 184 | YFWLFIEGLYLFTLLVETFFPERRYFYWYTIIGWGTPTVCVTVWATLRLYFDDTGCWDMN    | 243 |
| *****           |            |     |                                                                 |     |
| <u>P41586</u>   | PACR_HUMAN | 301 | DSTALWWVIKGPVVGSI MNVFLFIGIIVILVQKLQSPDMGNGNESSIY-----          | 348 |
| <u>P41586-2</u> | PACR_HUMAN | 301 | DSTALWWVIKGPVVGSI MNVFLFIGIIVILVQKLQSPDMGNGNESSIYFSCVQKCYCKPQ   | 360 |
| <u>P41586-3</u> | PACR_HUMAN | 280 | DSTALWWVIKGPVVGSI MNVFLFIGIIVILVQKLQSPDMGNGNESSIY-----          | 327 |
| <u>P41586-4</u> | PACR_HUMAN | 280 | DSTALWWVIKGPVVGSI MNVFLFIGIIVILVQKLQSPDMGNGNESSIYFSCVQKCYCKPQ   | 339 |
| <u>P41586-5</u> | PACR_HUMAN | 244 | DSTALWWVIKGPVVGSI MNVFLFIGIIVILVQKLQSPDMGNGNESSIY-----          | 291 |
| *****           |            |     |                                                                 |     |
| <u>P41586</u>   | PACR_HUMAN | 349 | -----LRLARSTLLLIPLFGIHYTVFAFSPENVSKRERL VFELGLGSFQ              | 392 |
| <u>P41586-2</u> | PACR_HUMAN | 361 | RAQQHSCKMSELSTITLRLARSTLLLIPLFGIHYTVFAFSPENVSKRERL VFELGLGSFQ   | 420 |
| <u>P41586-3</u> | PACR_HUMAN | 328 | -----LRLARSTLLLIPLFGIHYTVFAFSPENVSKRERL VFELGLGSFQ              | 371 |
| <u>P41586-4</u> | PACR_HUMAN | 340 | RAQQHSCKMSELSTITLRLARSTLLLIPLFGIHYTVFAFSPENVSKRERL VFELGLGSFQ   | 399 |
| <u>P41586-5</u> | PACR_HUMAN | 292 | -----LRLARSTLLLIPLFGIHYTVFAFSPENVSKRERL VFELGLGSFQ              | 335 |
| *****           |            |     |                                                                 |     |
| <u>P41586</u>   | PACR_HUMAN | 393 | GFVVAVLYCFLNGEVQAEIKRKWRSWKVNRYFAVDFKHRHPSLASSGVNGGTQLSILSKS    | 452 |
| <u>P41586-2</u> | PACR_HUMAN | 421 | GFVVAVLYCFLNGEVQAEIKRKWRSWKVNRYFAVDFKHRHPSLASSGVNGGTQLSILSKS    | 480 |
| <u>P41586-3</u> | PACR_HUMAN | 372 | GFVVAVLYCFLNGEVQAEIKRKWRSWKVNRYFAVDFKHRHPSLASSGVNGGTQLSILSKS    | 431 |
| <u>P41586-4</u> | PACR_HUMAN | 400 | GFVVAVLYCFLNGEVQAEIKRKWRSWKVNRYFAVDFKHRHPSLASSGVNGGTQLSILSKS    | 459 |
| <u>P41586-5</u> | PACR_HUMAN | 336 | GFVVAVLYCFLNGEVQAEIKRKWRSWKVNRYFAVDFKHRHPSLASSGVNGGTQLSILSKS    | 395 |
| *****           |            |     |                                                                 |     |
| <u>P41586</u>   | PACR_HUMAN | 453 | SSQIRMSG L PADNLAT                                              | 468 |
| <u>P41586-2</u> | PACR_HUMAN | 481 | SSQIRMSG L PADNLAT                                              | 496 |
| <u>P41586-3</u> | PACR_HUMAN | 432 | SSQIRMSG L PADNLAT                                              | 447 |
| <u>P41586-4</u> | PACR_HUMAN | 460 | SSQIRMSG L PADNLAT                                              | 475 |
| <u>P41586-5</u> | PACR_HUMAN | 396 | SSQIRMSG L PADNLAT                                              | 411 |
| *****           |            |     |                                                                 |     |

**Table S1.** Major isoforms of VIP and PACAP receptors according to Uniprot (accession date: 28 Dec 2021).

| Receptor     | Accession number        | Name                                                | Sequence length | Sequence modifications with respect to the reference sequence (isoform 1) |
|--------------|-------------------------|-----------------------------------------------------|-----------------|---------------------------------------------------------------------------|
| <b>VPAC1</b> | P32241-1                | reference sequence, isoform 1                       | 457             |                                                                           |
|              | P32241-2                | Isoform 2                                           | 492             | Additional fragment in N-termini                                          |
|              | P32241-3                | Isoform 3                                           | 247             | 5TM sequence                                                              |
|              | P32241-4                | Isoform 4                                           | 409             | Short variant according to Ota et al.                                     |
|              | P32241-5                | Isoform 5                                           | 416             | Short variant according to Ota et al.                                     |
| <b>VPAC2</b> | P41587-1                | Reference sequence, isoform 1                       | 438             |                                                                           |
|              | P41587-2                | Isoform 2                                           | 422             | Short variant according to Ota et al.                                     |
| <b>PAC1</b>  | P41586-1                | Reference sequence, PAC1 null, isoform N, isoform 1 | 468             |                                                                           |
|              | P41586-2                | PAC1 hop, Isoform N-HOP1                            | 496             | insertion hop cassette                                                    |
|              | P41586-3                | PAC1 $\delta$ 5-6 null, Isoform S                   | 447             | deletion exons 5-6                                                        |
|              | P41586-4                | PAC1 $\delta$ 5-6 hop, Isoform S-HOP1               | 475             | insertion hop cassette + deletion exons 5-6                               |
|              | P41586-5                | PAC1 $\delta$ 4-6 null, Isoform VS                  | 411             | deletion exons 4-6                                                        |
|              | NCBI ref XP_006715708.1 | PAC1 hip, Isoform X1                                | 496             | insertion hip cassette                                                    |
